# Supplementary material for: Knowledge and Education as Barriers and Facilitators to Nicotine Replacement Therapy Use for Smoking Cessation in Pregnancy: A Qualitative Study with Health Care Professionals
Source: MDPI journal article supplement (doi:10.3390/ijerph16101814), 2019-05-22
Supplement: s1 [file s1]

## **Focus Group topic guide**

### **1. Introducing the Topic**

- In your consultations do you describe the harms of smoking in pregnancy? If so, how do you do that?
- What kind of reaction do you get when NRT is mentioned?

### **2. Discussing NRT with pregnant women**

- What do you think are the main issues around actually talking about NRT?
- Are some women reluctant to talk about or try NRT? Can you think of any particular examples?
- Are some women keen to talk about or try NRT? Can you think of any particular examples?

### **3. After women have decided to use NRT or not**

- How do you feel when women are ambivalent or decline NRT?
- Why do you think some women decline NRT? What reasons do they give?
- What guides the choice of NRT type? Is there a difference between what you advise and what the women want to use?
- What do women need to know about taking NRT

### **4. Support required when women are using NRT**

- What if any are the issues occurring when clients have been using NRT for a short while?
- What support do you/can you offer women who have been using NRT?
- What type of support seems to work best?
- What support do you think should be available in an ideal world?

### **5. Concluding questions**

- Is there anything that we have not spoken about today that you think is important regarding NRT?
- Of all the things we've discussed today, what would you say are the most important issues?
