# Supplementary material for: Knowledge and Education as Barriers and Facilitators to Nicotine Replacement Therapy Use for Smoking Cessation in Pregnancy: A Qualitative Study with Health Care Professionals
Source: Int J Environ Res Public Health. 2019 May 22;16(10):1814. doi: 10.3390/ijerph16101814 (PMC6571581; doi:10.3390/ijerph16101814)
Supplement: Supplementary file 1 [file ijerph-16-01814-s001.zip]

Archive with 5 entries (4 files):
- ijerph-498492-supplementary/
- ijerph-498492-supplementary/Supplementary Materials S1.pdf
- ijerph-498492-supplementary/Supplementary Materials S2.pdf
- ijerph-498492-supplementary/~$pplementary Materials S1.docx
- ijerph-498492-supplementary/~$pplementary Materials S2.docx
